# Supplementary figures and images for: A simple sheath-flow microfluidic device for micro/nanomanufacturing: fabrication of hydrodynamically shaped polymer fibers
Source: Royal Society of Chemistry journal article supplement (doi:10.1039/b910581f), 2009-01-01

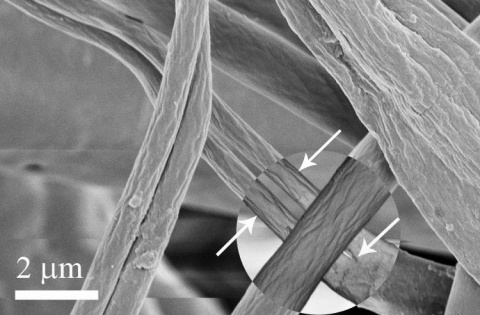

2  $\mu\text{m}$

Supplement: b910581f-figure1.pdf [file b910581f-figure1.pdf]
